# Supplementary material for: Zuranolone for the Treatment of Postpartum Depression
Source: Atypon-hosted journal article supplement (doi:10.1176/appi.ajp.20220785), 2023-07-26
Supplement: ajp_20220785_correction01.pdf [file ajp_20220785_correction01.pdf]

## **Correction to Deligiannidis et al.**

When the article “Zuranolone for the Treatment of Postpartum Depression” by Kristina M. Deligiannidis, M.D., et al. (doi/10.1176/appi.ajp.20220785) was published online July 26, 2023, and in the September 2023 issue, there was an error in Supplemental Table 1. The first MADRS total score timepoint after Baseline should have been Day 8, not Day 3. The data reported for this assessment point are unchanged, and this assessment date correction does not alter the study conclusions with respect to the efficacy and safety of zuranolone. A replacement supplement correcting the timepoint was posted on December 2, 2024.
